# Supplementary material for: Influence of timing of maternal antibiotic administration during caesarean section on infant microbial colonisation: a randomised controlled trial
Source: HighWire-hosted journal article supplement (doi:10.1136/gutjnl-2021-324767), 2021-11-21
Supplement: gutjnl-2021-324767supp002_data_supplement.pdf [file gutjnl-2021-324767supp002_data_supplement.pdf]

## Supplemental Figures Legends and Supplemental Tables

**Supplemental Figure 1: Principal coordinates analysis (PCoA) on genus level of faecal samples collected at day one, seven and 28 and three years postpartum analysed by 16S rRNA gene sequencing.** No clear difference were present between caesarean born infants whose mother received prophylactic antibiotics either before skin incision (group A: antenatally antibiotic exposed infants) or after umbilical cord clamping (group B: antenatally antibiotic unexposed infants) at day one, seven and 28. At day 28 samples from the vaginal control group (group C) clustered together, whereas both caesarean groups did not (1A). No differences were found between both caesarean groups (1B) nor between caesarean born infants and vaginally born infants (1C) at three years of age.

**Supplemental Figure 2: Relative abundance of Actinobacteria, Bacteroidetes, Firmicutes and Proteobacteria in faecal samples obtained at one, seven and 28 days analysed by 16S rRNA gene sequencing.** No differences were found between caesarean born infants whose mother received prophylactic antibiotics either before skin incision (group A: antenatally antibiotic exposed infants) or after umbilical cord clamping (group B: antenatally antibiotic unexposed infants). The microbiota of vaginally born infants (group C) harboured a decreased abundance of Firmicutes on day 28 ( $p=0.001$ ). In vaginally born infants a higher abundance of Bacteroidetes was observed at day 28 compared to caesarean born infants ( $p<0.001$ ).

**Supplemental Figure 3: Relative abundance of Actinobacteria, Bacteroidetes, Firmicutes and Proteobacteria in faecal samples obtained at seven and 28 days analysed by whole metagenome shotgun sequencing.** No differences were observed between caesarean born infants whose mother received prophylactic antibiotics either before skin incision (group A: antenatally antibiotic exposed infants) or after umbilical cord clamping (group B: antenatally antibiotic unexposed infants). The microbiota of vaginally born infants (group C) consisted of a higher abundance of Bacteroidetes at day seven and 28 ( $p=0,008$  and  $p<0.001$  respectively).

**Supplemental Figure 4: Abundance of potential antimicrobial resistance genes.** No significant differences were found in the potential antimicrobial resistance genes between caesarean born infants and vaginally born infants, nor between caesarean born infants whose mother received prophylactic antibiotics either before skin incision (group A: antenatally antibiotic exposed infants) or after umbilical cord clamping (group B: antenatally antibiotic unexposed infants).

**Supplemental Table 1. Number of sequences obtained per sample**

| Sample ID | Sampling set | Group   | Number of 16S sequences | Number of metagenomics sequences |
|-----------|--------------|---------|-------------------------|----------------------------------|
| AA24952   | Day 1        | Group A | 50897                   | -                                |
| AA24963   | Day 1        | Group A | 27933                   | -                                |
| AA24965   | Day 1        | Group B | 19302                   | -                                |
| AA24969   | Day 1        | Group B | 30707                   | -                                |
| AA24999   | Day 1        | Group C | 31326                   | -                                |
| AA25010   | Day 1        | Group C | 35782                   | -                                |
| AA25019   | Day 1        | Group C | 25500                   | -                                |
| AA25027   | Day 1        | Group C | 15810                   | -                                |
| AA25038   | Day 1        | Group C | 51714                   | -                                |
| AA25041   | Day 1        | Group C | 46048                   | -                                |
| AA25044   | Day 1        | Group A | 41259                   | -                                |
| AA09818   | Day 7        | Group B | 30475                   | -                                |
| AA09820   | Day 7        | Group B | 14216                   | -                                |
| AA09822   | Day 7        | Group A | -                       | 9113447                          |
| AA09824   | Day 7        | Group C | -                       | 15860278                         |
| AA24937   | Day 7        | Group B | -                       | 10638968                         |
| AA24939   | Day 7        | Group A | 34404                   | 3244154                          |
| AA24941   | Day 7        | Group B | 40410                   | 13540838                         |
| AA24943   | Day 7        | Group A | 34547                   | 6406240                          |
| AA24946   | Day 7        | Group B | -                       | 10050001                         |
| AA24947   | Day 7        | Group A | 34675                   | 10605489                         |
| AA24950   | Day 7        | Group B | 45211                   | 11406617                         |
| AA24951   | Day 7        | Group A | -                       | 10498131                         |
| AA24953   | Day 7        | Group A | 20252                   | 10707054                         |
| AA24955   | Day 7        | Group B | 18958                   | 6385863                          |
| AA24957   | Day 7        | Group A | 18219                   | 9886883                          |
| AA24960   | Day 7        | Group B | 26351                   | 1237749                          |
| AA24962   | Day 7        | Group A | 29636                   | 1980407                          |
| AA24964   | Day 7        | Group A | -                       | 4210914                          |
| AA24966   | Day 7        | Group B | 25645                   | 4998217                          |
| AA24968   | Day 7        | Group A | 19681                   | 8813164                          |
| AA24970   | Day 7        | Group B | -                       | 8296905                          |
| AA24972   | Day 7        | Group B | 22721                   | 12920654                         |
| AA24974   | Day 7        | Group B | 22586                   | 9234141                          |
| AA24978   | Day 7        | Group A | 29155                   | 12242575                         |
| AA24980   | Day 7        | Group B | 21289                   | -                                |
| AA24982   | Day 7        | Group A | 19950                   | 8987614                          |
| AA24984   | Day 7        | Group A | 29341                   | 4698384                          |
| AA24987   | Day 7        | Group A | 25389                   | 9497311                          |
| AA24989   | Day 7        | Group A | 19714                   | -                                |

|         |        |         |       |          |
|---------|--------|---------|-------|----------|
| AA24992 | Day 7  | Group A | 24924 | 3601621  |
| AA24993 | Day 7  | Group C | 30450 | 4459255  |
| AA24994 | Day 7  | Group C | 28323 | 9513531  |
| AA24995 | Day 7  | Group C | 22061 | 3575556  |
| AA24996 | Day 7  | Group C | 35929 | 12977872 |
| AA24997 | Day 7  | Group C | 29510 | 16950146 |
| AA24998 | Day 7  | Group C | 23464 | 9521817  |
| AA25000 | Day 7  | Group C | 33482 | 16849679 |
| AA25002 | Day 7  | Group C | -     | 13250816 |
| AA25005 | Day 7  | Group C | -     | 19473464 |
| AA25008 | Day 7  | Group C | 33324 | 8900244  |
| AA25011 | Day 7  | Group C | 30450 | 5599317  |
| AA25014 | Day 7  | Group C | 25516 | 11622872 |
| AA25017 | Day 7  | Group C | 31775 | 7149352  |
| AA25020 | Day 7  | Group C | 30518 | 11715321 |
| AA25023 | Day 7  | Group C | 27752 | -        |
| AA25026 | Day 7  | Group B | 20796 | -        |
| AA25028 | Day 7  | Group C | 26853 | -        |
| AA25032 | Day 7  | Group C | 31358 | 4918680  |
| AA25034 | Day 7  | Group B | 24742 | 13502798 |
| AA25036 | Day 7  | Group C | 20844 | 8006034  |
| AA25039 | Day 7  | Group C | 22460 | 12502858 |
| AA25042 | Day 7  | Group C | 27993 | 1076734  |
| AA25045 | Day 7  | Group A | 91901 | 8376491  |
| AA25047 | Day 7  | Group B | 18112 | 11553451 |
| AA25049 | Day 7  | Group C | 18313 | 4156109  |
| AA10089 | Day 28 | Group B | 40506 | 7817548  |
| AA10090 | Day 28 | Group B | 26425 | 1872943  |
| AA10091 | Day 28 | Group A | 33530 | 10356295 |
| AA10092 | Day 28 | Group B | 22357 | -        |
| AA10093 | Day 28 | Group B | 25820 | -        |
| AA10094 | Day 28 | Group A | 32406 | 6035146  |
| AA10096 | Day 28 | Group C | 30160 | 14350498 |
| AA10097 | Day 28 | Group C | 32196 | 13925968 |
| AA10098 | Day 28 | Group C | -     | 16122653 |
| AA10099 | Day 28 | Group C | 36439 | 13202313 |
| AA10100 | Day 28 | Group C | 41987 | 13197372 |
| AA10101 | Day 28 | Group C | 43322 | 10700912 |
| AA10102 | Day 28 | Group C | 38445 | 12448035 |
| AA10103 | Day 28 | Group C | -     | 12775669 |
| AA10420 | Day 28 | Group B | 54726 | 5766033  |
| AA10421 | Day 28 | Group A | 26102 | 2469575  |
| AA10422 | Day 28 | Group A | 33003 | 7862706  |
| AA10423 | Day 28 | Group B | 34069 | 6312048  |

|         |        |         |       |          |
|---------|--------|---------|-------|----------|
| AA10424 | Day 28 | Group A | 30537 | 8916357  |
| AA10425 | Day 28 | Group A | 33660 | 12749244 |
| AA10426 | Day 28 | Group B | 36393 | 14620124 |
| AA10427 | Day 28 | Group A | 31677 | 10851422 |
| AA10428 | Day 28 | Group A | 38832 | 5850450  |
| AA10429 | Day 28 | Group B | 43623 | 10569159 |
| AA10430 | Day 28 | Group B | 22035 | 4888283  |
| AA10431 | Day 28 | Group B | 53208 | 6654034  |
| AA10432 | Day 28 | Group A | 33386 | -        |
| AA23596 | Day 28 | Group A | 24972 | 1976908  |
| AA23597 | Day 28 | Group A | 36870 | 9620211  |
| AA23598 | Day 28 | Group B | 39720 | 8430193  |
| AA23599 | Day 28 | Group A | 39256 | 8719615  |
| AA23600 | Day 28 | Group B | 34432 | 10661405 |
| AA23601 | Day 28 | Group B | 30010 | 11865685 |
| AA23602 | Day 28 | Group B | 23741 | 7745166  |
| AA23603 | Day 28 | Group B | 35156 | 10798882 |
| AA23604 | Day 28 | Group A | 35293 | 12333076 |
| AA23605 | Day 28 | Group B | 38711 | 6609018  |
| AA23606 | Day 28 | Group A | 50909 | 8333536  |
| AA23607 | Day 28 | Group A | 44964 | 9471141  |
| AA23608 | Day 28 | Group B | 26313 | 2686349  |
| AA23609 | Day 28 | Group A | 35109 | 7264728  |
| AA23611 | Day 28 | Group A | 35172 | 13161207 |
| AA23612 | Day 28 | Group B | 30526 | 11808616 |
| AA23613 | Day 28 | Group B | 35306 | 8579318  |
| AA23614 | Day 28 | Group A | 32967 | 7273629  |
| AA23615 | Day 28 | Group B | 18346 | 3348406  |
| AA23616 | Day 28 | Group A | 35252 | 9892861  |
| AA24990 | Day 28 | Group A | 28297 | 11736286 |
| AA25003 | Day 28 | Group C | 23301 | 10034500 |
| AA25006 | Day 28 | Group C | 26197 | 2095688  |
| AA25009 | Day 28 | Group C | 29822 | 4985294  |
| AA25012 | Day 28 | Group C | 25635 | 12809482 |
| AA25015 | Day 28 | Group C | 25485 | 14600876 |
| AA25018 | Day 28 | Group C | 25957 | 15441793 |
| AA25021 | Day 28 | Group C | 30393 | -        |
| AA25024 | Day 28 | Group C | 24485 | -        |
| AA25029 | Day 28 | Group C | 27207 | 15129185 |
| AA25031 | Day 28 | Group C | -     | 14717464 |
| AA25033 | Day 28 | Group C | 26945 | 5609728  |
| AA25037 | Day 28 | Group C | -     | 5780764  |
| AA25040 | Day 28 | Group C | 20014 | 9574706  |
| AA25043 | Day 28 | Group C | 28300 | 7538248  |

|         |        |         |       |          |
|---------|--------|---------|-------|----------|
| AA25050 | Day 28 | Group C | 17026 | 10582712 |
| F1      | 3 year | Group B | 56087 | -        |
| F100    | 3 year | Group A | 59486 | -        |
| F101    | 3 year | Group B | 62750 | -        |
| F102    | 3 year | Group A | 22986 | -        |
| F11     | 3 year | Group B | 58114 | -        |
| F12     | 3 year | Group A | 77817 | -        |
| F13     | 3 year | Group A | 86050 | -        |
| F14     | 3 year | Group B | 66479 | -        |
| F15     | 3 year | Group A | 51314 | -        |
| F18     | 3 year | Group B | 58881 | -        |
| F22     | 3 year | Group B | 57706 | -        |
| F23     | 3 year | Group A | 61793 | -        |
| F24     | 3 year | Group A | 40379 | -        |
| F26     | 3 year | Group A | 55719 | -        |
| F27     | 3 year | Group B | 95091 | -        |
| F3      | 3 year | Group A | 55965 | -        |
| F32     | 3 year | Group B | 64714 | -        |
| F34     | 3 year | Group B | 51787 | -        |
| F36     | 3 year | Group A | 38209 | -        |
| F37     | 3 year | Group B | 65984 | -        |
| F38.1   | 3 year | Group A | 58977 | -        |
| F38.2   | 3 year | Group C | 64393 | -        |
| F4      | 3 year | Group B | 43865 | -        |
| F41     | 3 year | Group A | 88392 | -        |
| F44     | 3 year | Group B | 42543 | -        |
| F47     | 3 year | Group A | 38138 | -        |
| F49     | 3 year | Group A | 72713 | -        |
| F5      | 3 year | Group B | 55879 | -        |
| F51     | 3 year | Group C | 75464 | -        |
| F52     | 3 year | Group C | 74967 | -        |
| F53     | 3 year | Group C | 74764 | -        |
| F56     | 3 year | Group C | 89943 | -        |
| F58     | 3 year | Group C | 56158 | -        |
| F59     | 3 year | Group C | 26708 | -        |
| F60     | 3 year | Group C | 71171 | -        |
| F67     | 3 year | Group C | 71670 | -        |
| F69     | 3 year | Group C | 66908 | -        |
| F70     | 3 year | Group C | 64402 | -        |
| F72     | 3 year | Group C | 67319 | -        |
| F78     | 3 year | Group C | 46404 | -        |
| F81     | 3 year | Group C | 72200 | -        |
| F82     | 3 year | Group C | 57237 | -        |
| F84     | 3 year | Group B | 53768 | -        |

|     |        |         |       |   |
|-----|--------|---------|-------|---|
| F85 | 3 year | Group C | 53126 | - |
| F86 | 3 year | Group C | 49856 | - |
| F87 | 3 year | Group C | 80722 | - |
| F89 | 3 year | Group B | 71336 | - |
| F90 | 3 year | Group C | 43170 | - |
| F96 | 3 year | Group C | 78599 | - |

A minus sign (-) indicates that not enough DNA could be obtained, which was true for most meconium samples, and/or not enough good quality sequences were generated. If this was true for both 16S and metagenomic sequencing, samples are not listed in this table.

**Supplemental Table 2. Summary of results originating from the questionnaire on health state at the age of 3 year.**

No differences were present between caesarean born infants whose mother received prophylactic antibiotics either before skin incision (group A: antenatally antibiotic exposed infants) or after cord clamp (group B: antenatally antibiotic exposed infants) and vaginally delivering women (group C).

| Variables                                                      | Group A (n= 14) | Group B (n=15) | Group C (n=20) | P-value |
|----------------------------------------------------------------|-----------------|----------------|----------------|---------|
| <b>Duration of breastfeeding, Months</b>                       | 7.0 (8.5)       | 6.0 (3.75)     | 6.0 (4.6)      | 0.236   |
| <b>Started with supplementary feeding, Months</b>              | 5.5 (2.0)       | 4.0 (1.0)      | 4.0 (2.0)      | 0.186   |
| <b>Antibiotic use between birth and last sample collection</b> | 2 (14.3%)       | 2 (13.3%)      | 5 (25.0%)      | 0.608   |
| <b>Body mass index, kg/m<sup>2</sup></b>                       | 16.5 (1.76)     | 15.46 (1.75)   | 16.45 (2.69)   | 0.159   |
| <b>Hospitalization</b>                                         | 3 (21.4%)       | 4 (26.7%)      | 3 (15.0%)      | 0.694   |
| <b>General practitioner visited</b>                            | 13 (92.9%)      | 14 (93.3%)     | 18 (90.0%)     | 0.926   |
| <b>Paediatrician visits</b>                                    | 2 (14.3%)       | 5 (33.3%)      | 4 (20.0%)      | 0.444   |
| <b>Allergy</b>                                                 | 2 (14.3%)       | 0 (0.0%)       | 2 (10.0%)      | 0.346   |
| <b>Viral wheezing</b>                                          | 2 (14.3%)       | 2 (13.3%)      | 2 (10.0%)      | 0.921   |
| <b>Eczema</b>                                                  | 3 (21.4%)       | 3 (20.0%)      | 4 (20.0%)      | 0.994   |

Data are median (interquartile range) or n (%).
