# Supplementary material for: Influence of timing of maternal antibiotic administration during caesarean section on infant microbial colonisation: a randomised controlled trial
Source: HighWire-hosted journal article supplement (doi:10.1136/gutjnl-2021-324767), 2021-11-21
Supplement: gutjnl-2021-324767supp006_data_supplement.pdf [file gutjnl-2021-324767supp006_data_supplement.pdf]

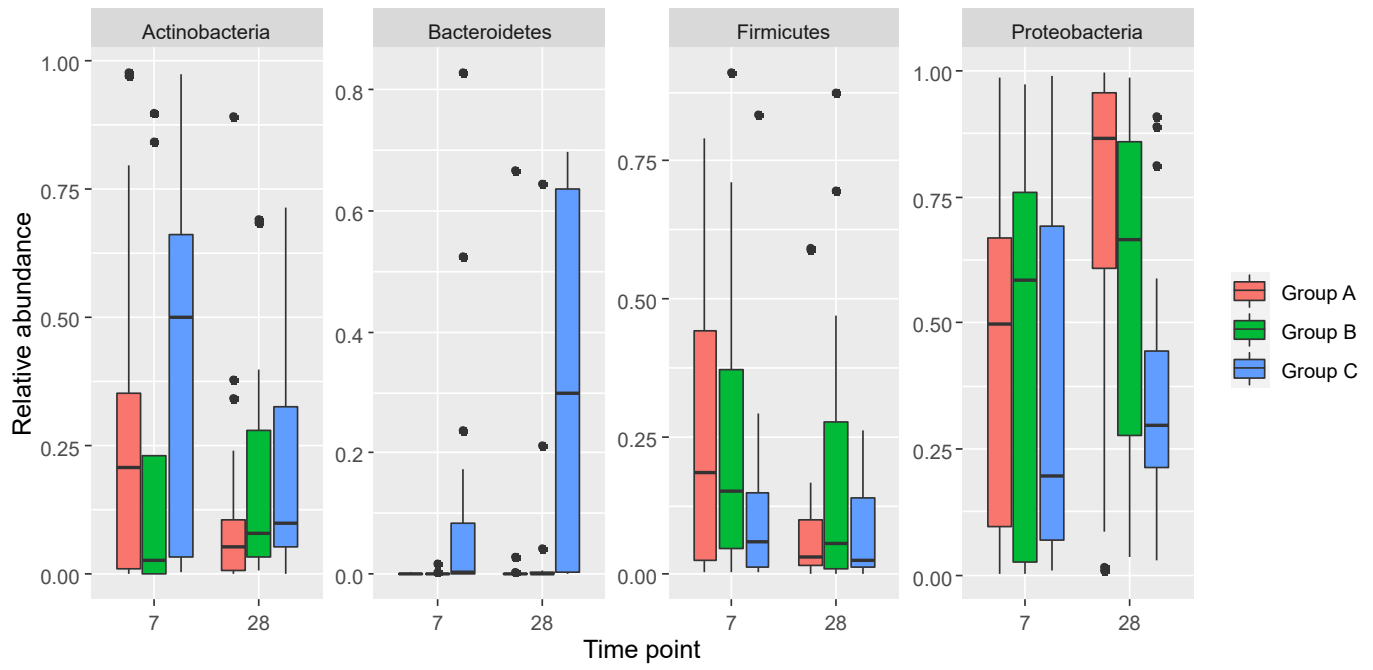

Figure S3
